# Supplementary material for: Identification Of A New Role Of miR-199a-5p As Factor Implied In Neuronal Damage: Decreasing The Expression Of Its Target X-Linked Anti-Apoptotic Protein (XIAP) After SCI.
Source: Preprints.org preprint supplement (doi:10.20944/preprints202212.0020.v1), 2022-12-01
Supplement: Supplementary file 2 [file supplementary]

**Supplementary data 3.** Sequences of the probes used for miR-199a-5p detection by FISH. Oligonucleotide probe sequences complementary to miR-199a-5p and negative control mimics with no complementary targets. Probes are composed of the combination of 2'-O-methyl (I I) and LNA ({} ) nucleotides designed following the method from S  e et al. 2011).

| Probe            | Sequence                                                                |
|------------------|-------------------------------------------------------------------------|
| Negative control | 5'- DIG - [G]{T}[GU]{AC}[A][CG]{T}[CU]{A}[UA]{C}<br>[GC]{C}[C][CA] - 3' |
| miR-199a-5p      | 5'-DIG - {G}[AA]{C}[AG]{G}[UA]{G}[UC]{T}[GA]{A}<br>[CA]{C}[UG]{GG} - 3' |
