# Supplementary material for: Identification Of A New Role Of miR-199a-5p As Factor Implied In Neuronal Damage: Decreasing The Expression Of Its Target X-Linked Anti-Apoptotic Protein (XIAP) After SCI.
Source: Preprints.org preprint supplement (doi:10.20944/preprints202212.0020.v1), 2022-12-01
Supplement: Supplementary file 4 [file supplementary]

**Supplementary data 1.** Primers used for subcloning of XIAP 3'UTR-wt and XIAP 3'UTR-mut, and DNA sequencing.

| <b>Primer</b>             | <b>Sequences (5'-3')</b>                                                                       |
|---------------------------|------------------------------------------------------------------------------------------------|
| <b>XIAP 3'UTR-wt</b>      | <i>Forward:</i> ATCGAGCTCCACAGTAGGCATGTTATG<br><i>Reverse:</i> ATAGTCGACCTGTGATGCTTTTCTATGTCAG |
| <b>XIAP 3'UTR-mut</b>     | <i>Forward:</i> GTTCCAAGATCTTTGGAGG<br><i>Reverse:</i> CCTCCAAAGATCTTGGAACAGTTC                |
| <b>pmiRGLO sequencing</b> | CAAGAAGGGCGGCAAGATCG                                                                           |
