# Supplementary material for: Identification Of A New Role Of miR-199a-5p As Factor Implied In Neuronal Damage: Decreasing The Expression Of Its Target X-Linked Anti-Apoptotic Protein (XIAP) After SCI.
Source: Preprints.org preprint supplement (doi:10.20944/preprints202212.0020.v1), 2022-12-01
Supplement: Supplementary file 8 [file supplementary]

**Supplementary data 2.** Detailed data for each antibody can be accessed at [antibodyregistry.org](http://antibodyregistry.org) using the provided RRID codes.

| Antibody                                               | Reference                                                                          |
|--------------------------------------------------------|------------------------------------------------------------------------------------|
| <b>Primary antibodies for Immunoblot</b>               |                                                                                    |
| anti-Actin                                             | BD Biosciences Cat# 612656, RRID:AB_2289199                                        |
| anti-XIAP                                              | R and D Systems Cat# AF8221, RRID:AB_2215008                                       |
| <b>Primary antibodies for Immunofluorescence</b>       |                                                                                    |
| anti-XIAP                                              | R and D Systems Cat# AF8221, RRID:AB_2215008<br>Abcam Cat# ab21278, RRID:AB_446157 |
| anti-NeuN                                              | Millipore Cat# ABN78, RRID:AB_10807945                                             |
| <b>Primary antibodies for FISH</b>                     |                                                                                    |
| Alkaline phosphatase-conjugated sheep-anti-digoxigenin | Sigma-Aldrich Cat# 11093274910, RRID:AB_2734716                                    |
| <b>Secondary antibodies for Immunoblotting</b>         |                                                                                    |
| HRP-conjugated goat anti-rabbit                        | Cell Signaling Technology Cat# 7074, RRID:AB_2099233                               |
| HRP-conjugated goat anti-mouse                         | Cell Signaling Technology Cat# 7076, RRID:AB_330924                                |
| <b>Secondary antibodies for Immunofluorescence</b>     |                                                                                    |
| Alexa Fluor 488 goat anti-rabbit                       | Life Technologies Cat# A11034, RRID:AB_10562715                                    |
| Alexa Fluor 488 goat anti-mouse highly-cross adsorbed  | Molecular Probes Cat# A11029, RRID:AB_138404                                       |
