# Supplementary figures and images for: Identification Of A New Role Of miR-199a-5p As Factor Implied In Neuronal Damage: Decreasing The Expression Of Its Target X-Linked Anti-Apoptotic Protein (XIAP) After SCI.
Source: Preprints.org preprint supplement (doi:10.20944/preprints202212.0020.v1), 2022-12-01

## Supporting information for Figure 6

uninjured spinal cord

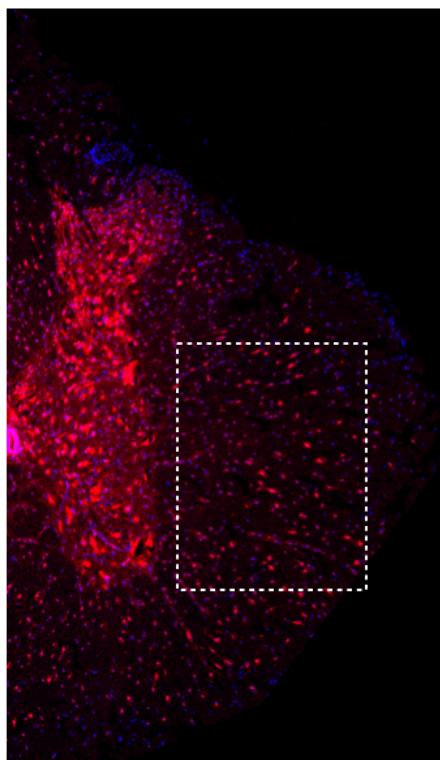

3 dpi

Rostral

Caudal

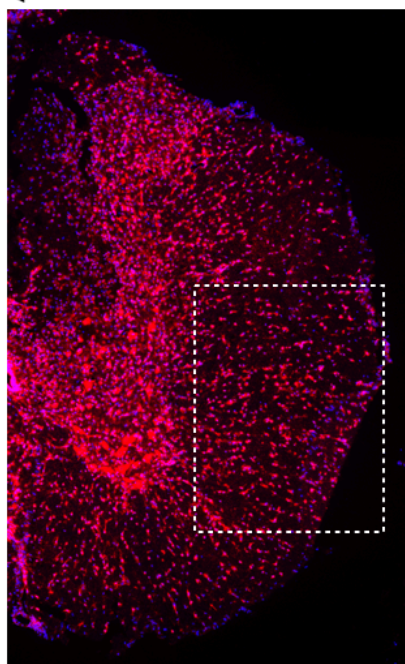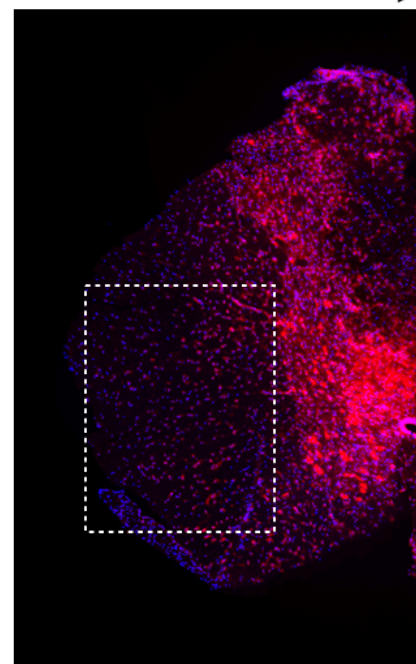

7 dpi

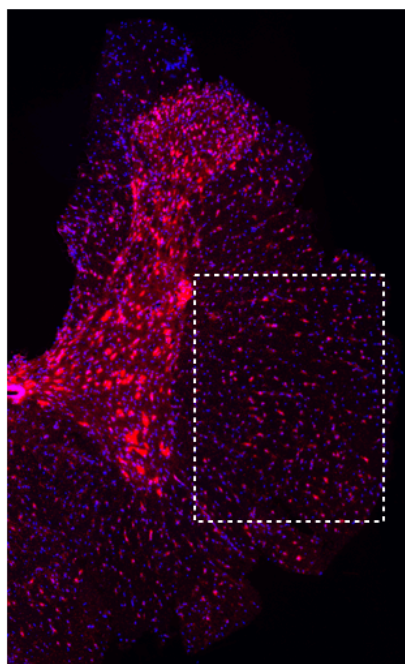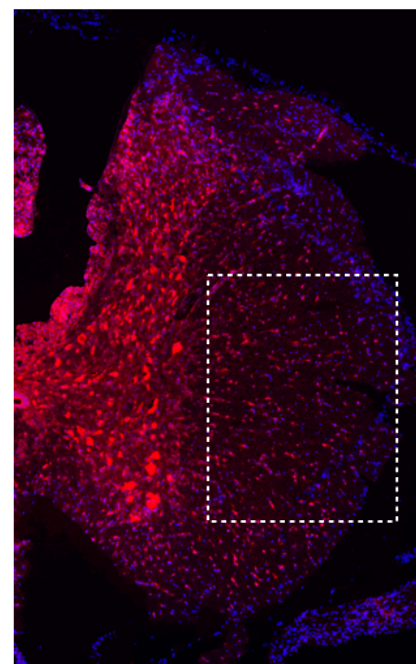

Supplement: Supplementary file 3 [file supplementary]

## Supporting information for Figure 7

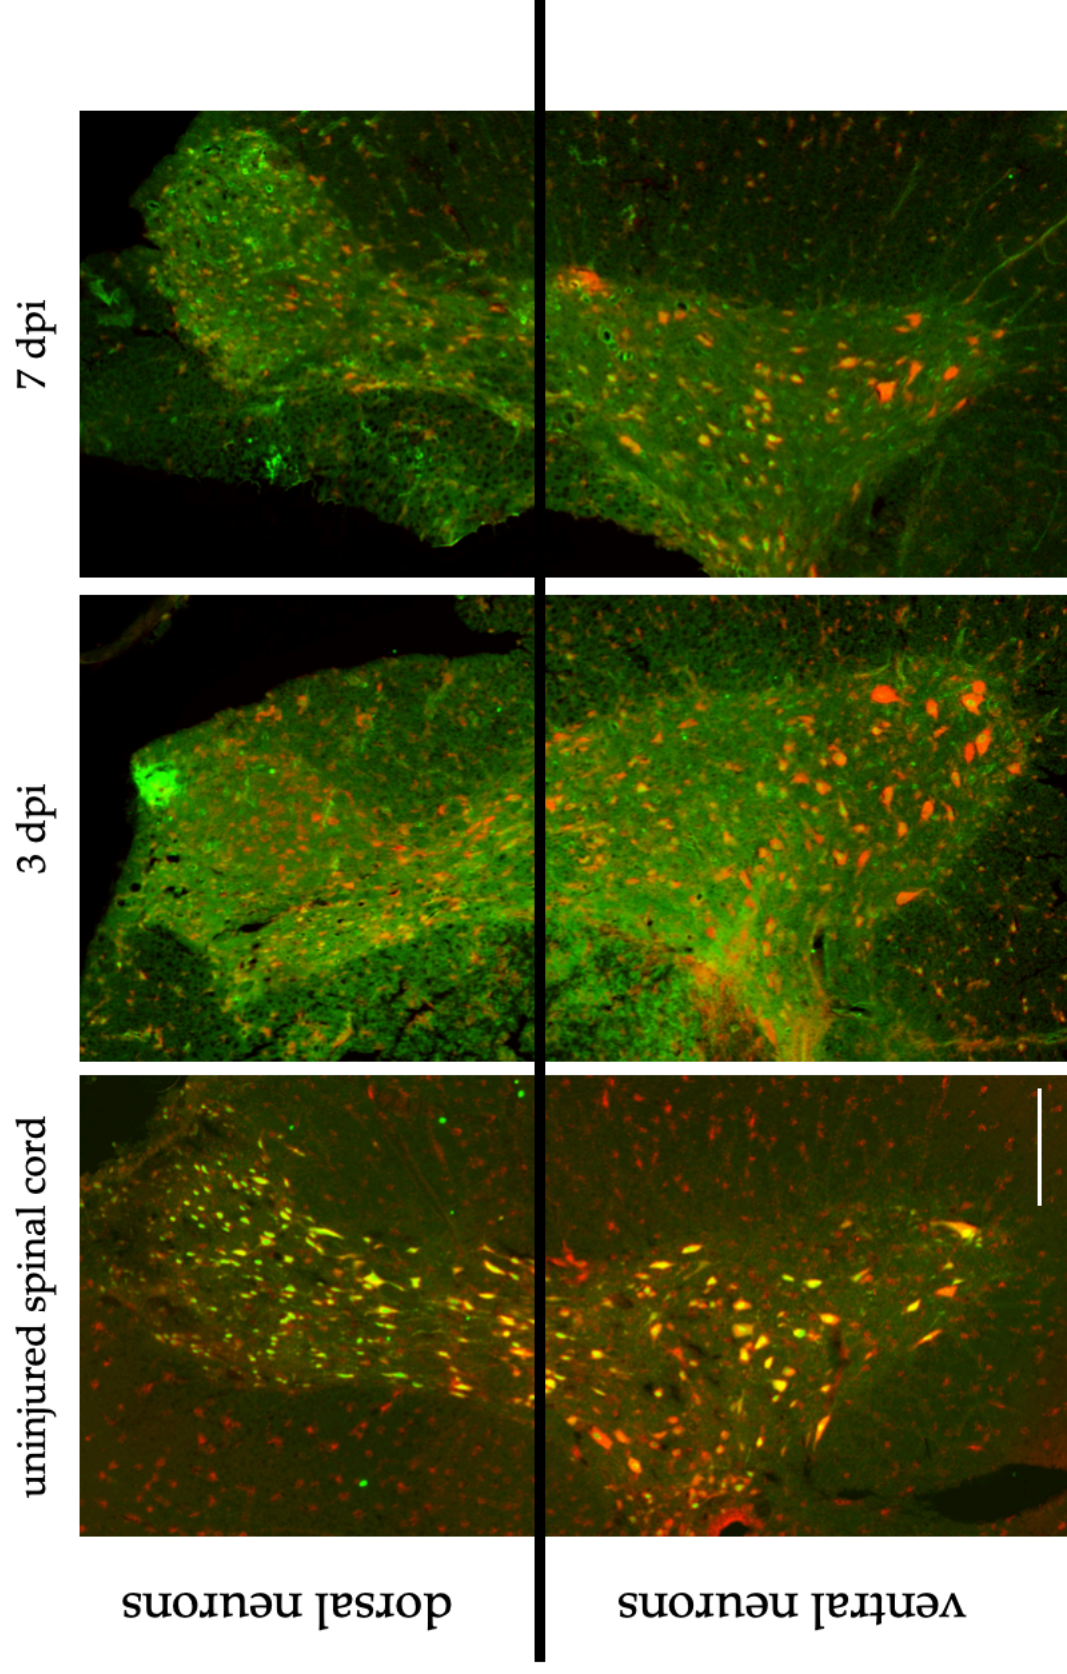

Supplement: Supplementary file 10 [file supplementary]
